# Supplementary material for: Early warning technology for common characteristic resistances of lithium-ion batteries with thermal runaway
Source: Royal Society of Chemistry journal article supplement (doi:10.1039/d3cc05086f), 2023-11-15
Supplement: d3cc05086f1.pdf [file d3cc05086f1.pdf]

Electronic Supplementary Information (ESI)

For

**Early warning technology of common characteristic resistances for lithium-ion batteries with thermal runaway**

## 1 Supplementary Figures and Tables

**Table S1** Common characteristic temperatures ( $T_1, T_2, T_3$ ) and their times ( $t_1, t_2, t_3$ ) of the test batteries.

| Test batteries | $T_1$ (°C) | $t_1$ (min) | $T_2$ (°C) | $t_2$ (min) | $T_3$ (°C) | $t_3$ (min) |
|----------------|------------|-------------|------------|-------------|------------|-------------|
| S1             | 96.7       | 593.2       | 146.9      | 1315.3      | 789.7      | 1326.0      |
| S2             | 97.3       | 591.3       | 148.6      | 1512.7      | 762.6      | 1523.9      |
| S3             | 96.7       | 600.9       | 153.2      | 1140.5      | 759.5      | 1151.1      |

**Table S2** Parameters of the resistance system before  $t_1$ .

| Test batteries | $t_{R1}$ (min) | $t_{R2}$ (min) | $t_{R3}$ (min) | $t_1$ (min) | $\Delta t_1(t_1 - t_{R3})$ (min) |
|----------------|----------------|----------------|----------------|-------------|----------------------------------|
| S1             | 496.5          | 500.6          | 548.7          | 593.2       | 44.5                             |
| S2             | 507.9          | 513.0          | 553.3          | 591.3       | 38.0                             |
| S3             | 488.8          | 507.4          | 575.0          | 600.9       | 25.9                             |

**Table S3** Key parameters of the resistance system near  $t_2$ .

| Test batteries | $t_{R4}$ (min) | $t_2$ (min) | $\Delta t_2(t_2 - t_{R4})$ (min) |
|----------------|----------------|-------------|----------------------------------|
| S1             | 1311.5         | 1315.3      | 3.8                              |
| S2             | 1505.0         | 1512.7      | 7.7                              |
| S3             | 1123.0         | 1140.5      | 17.5                             |

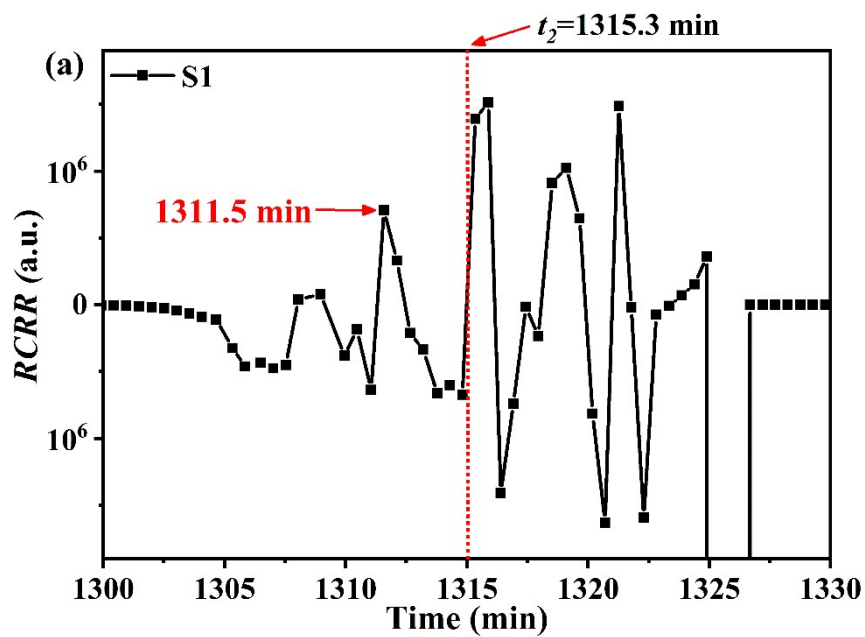

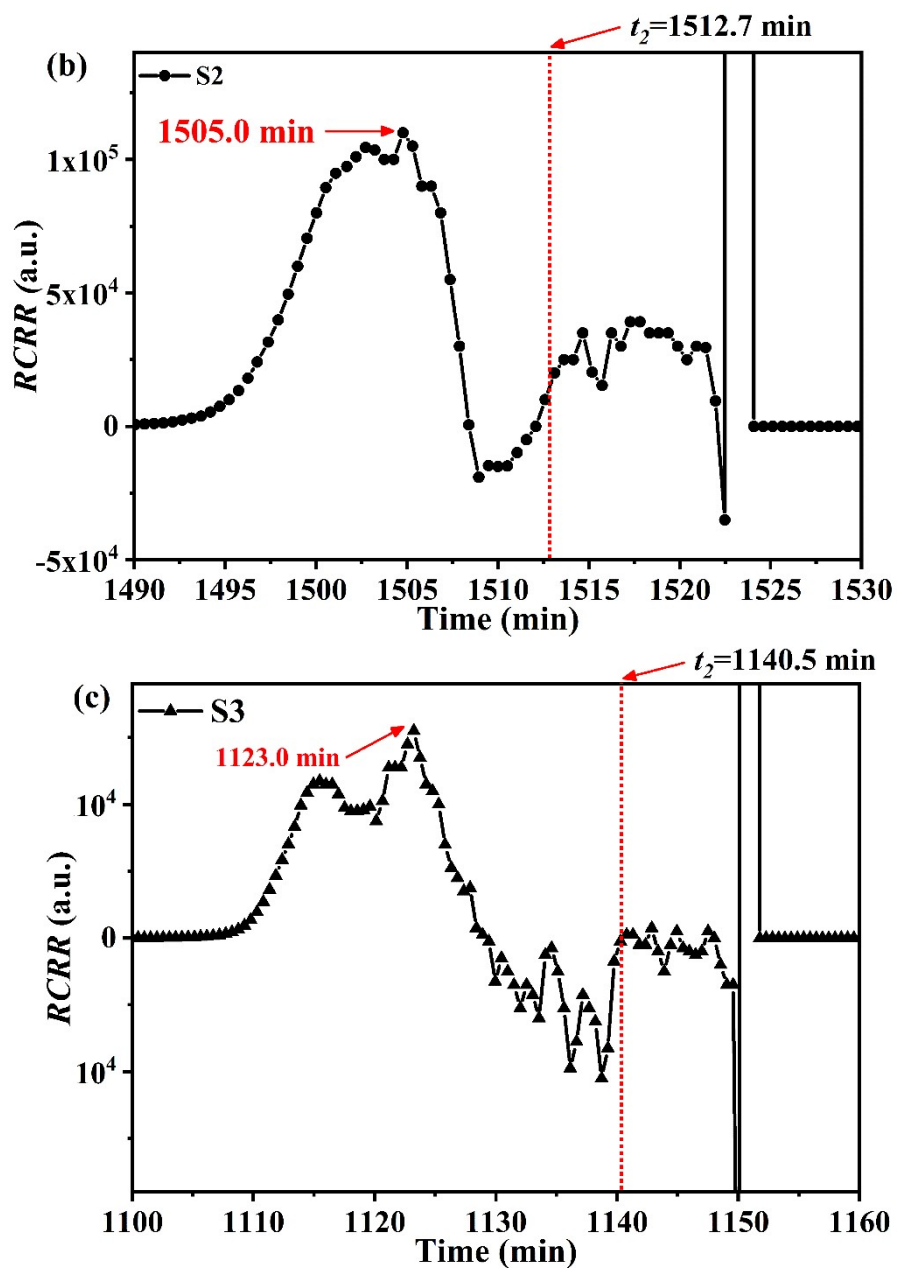

**Figure S1** Special tendencies of *RCRR* before  $t_2$  of (a) S1, (b) S2 and (c) S3.

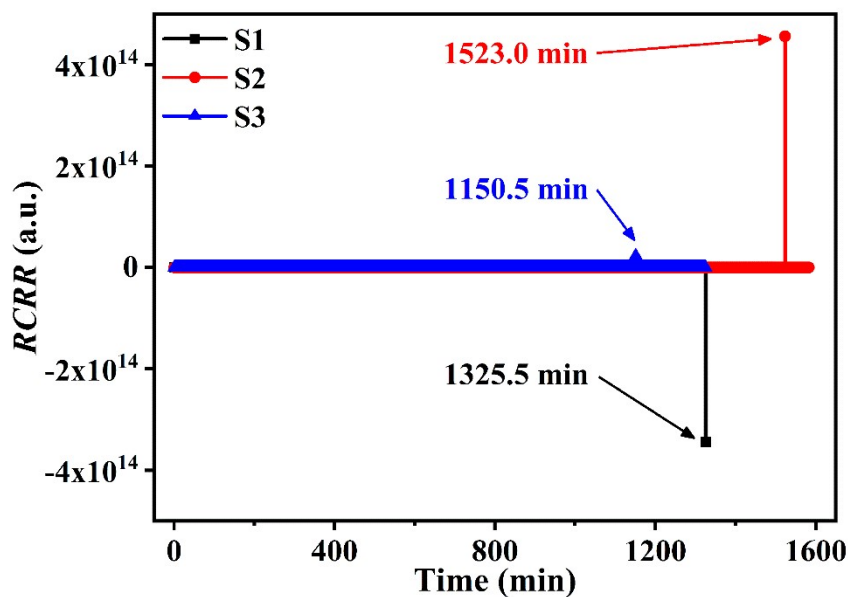

**Figure S2** Peaks of  $RCRR$  for the test batteries.

**Table S4** Parameters for the verification of the resistance system.

| Test batteries | $t_{R_{max}}$ (min) | $t_3$ (min) | $\Delta t_3 (t_3 - t_{R_{max}})$ (min) |
|----------------|---------------------|-------------|----------------------------------------|
| S1             | 1325.5              | 1326.0      | 0.5                                    |
| S2             | 1523.0              | 1523.9      | 0.9                                    |
| S3             | 1150.5              | 1151.1      | 0.6                                    |

**Table S5** Comparison of key time points between experimental measured values and thermodynamics calculated values.

| Test batteries | $t_{R_3}$ (min)  |                |               | $t_{R_4}$ (min)  |                |               | $t_{R_{max}}$ (min) |                |               |
|----------------|------------------|----------------|---------------|------------------|----------------|---------------|---------------------|----------------|---------------|
|                | Calculated value | Measured value | Deviation (%) | Calculated value | Measured value | Deviation (%) | Calculated value    | Measured value | Deviation (%) |
| S1             | 540.5            | 548.7          | 1.52          | 1310.8           | 1311.5         | 0.05          | 1325.0              | 1325.5         | 0.04          |
| S2             | 542.0            | 553.3          | 2.08          | 1502.4           | 1505.0         | 0.17          | 1523.0              | 1523.0         | 0.00          |
| S3             | 550.8            | 575.0          | 4.39          | 1125.4           | 1123.0         | -0.21         | 1150.6              | 1150.5         | -0.01         |

## 2 Thermodynamics calculation

The thermodynamics calculation for Figure 4 is carried out based on Arrhenius formula (Equation S1) and Nernst equation (Equation S2) in order to further verify the technology proposed through the experiments mentioned above. In the following equations,  $R_0$  is the gas constant,  $F$  is Faraday's constant,  $A$ ,  $A_1$ ,  $A_2$  are constants.  $E_a$  is activation energy,  $T$  is temperature,  $\Delta G$  is Gibbs free energy,  $n$  is mole number of electrons involved in the reaction,  $E$  is potential, which equals to the open circle voltage (OCV),  $R$  is the resistance measured. And  $k$  is rate coefficient that positively correlated with the rate of chemical reactions. As the resistance is negatively correlated with the rate of reactions, the relationship between  $k$  and  $R$  is described as Equation S3. Based on Equation S3, Equation S1 is transformed into Equation S4. After differentiation, the variation of  $R$  with  $T$  ( $dR/dT$ ) is calculated with Equation S5 and displayed in Figure 4.

As for relationships between the calculated  $E$  with  $t$ , and  $T$  with  $t$ , are given with the data measured in the ARC experiments.

$$k = Ae^{-E_a/(R_0T)} \quad (S1)$$

$$E_a = \Delta G = -nFE \quad (S2)$$

$$k \propto \frac{1}{R} \quad (S3)$$

$$R = A_1 \frac{1}{\frac{nFE}{R_0T}} \quad (S4)$$

$$\frac{dR}{dT} = \frac{A_2 \cdot E}{T^2} \cdot e^{\frac{-nF}{R_0} \cdot \frac{E}{T}} \quad (S5)$$

### 3 Defined symbols and abbreviations

**Table S6** List of defined symbols and abbreviations

| Defined symbols or abbreviations | Explanation                                          |
|----------------------------------|------------------------------------------------------|
| LIBs                             | lithium-ion batteries                                |
| TR                               | thermal runaway                                      |
| $T_1$                            | the beginning temperature of self-exothermic process |
| $T_2$                            | the onset temperature of TR                          |
| $T_3$                            | the top temperature throughout the TR procedure      |
| ARC                              | accelerating rate calorimeter                        |
| HWS                              | Heat-Wait-Search mode of the ARC experiment          |
| AC                               | alternating current                                  |
| $CRR$                            | change rate                                          |
| $R_1$                            | abnormal resistance                                  |
| $R_2$                            | reminding resistance                                 |
| $R_3$                            | warning resistance                                   |
| $R_4$                            | decision resistance                                  |
| $R_{max}$                        | the maximum resistance                               |
| SOC                              | state of charge                                      |
| ESI                              | electronic supplementary information                 |
| SER                              | self-exothermic rate                                 |
| RMS                              | the alternating root mean square                     |
| $U$                              | voltage                                              |
| $I$                              | current                                              |
| $R_n$                            | the internal AC resistance                           |
| $CRR$                            | the change rate of resistance                        |
| $RCRR$                           | relative change rate of resistance                   |
